# Supplementary material for: Phytochemistry, Ethnopharmacology, Pharmacokinetics and Toxicology of Cnidium monnieri (L.) Cusson
Source: PubMed Central journal article supplement (PMC7037677; doi:10.3390/ijms21031006), 2020-02-03
Supplement: ijms-21-01006-s001.pdf [file ijms-21-01006-s001.pdf]

**Supplementary Table 1.** Chemical compounds isolated from *Cnidium monnieri* (L.) Cusson

| Name                       | Pubchem ID or chemspider ID | Extraction methods, references, voucher numbers or specimens |
|----------------------------|-----------------------------|--------------------------------------------------------------|
| Coumarins                  |                             |                                                              |
| 2'-Acetylangelicin         | PubChem SID: 52466591       | Extraction method: CEC Reference: [1]                        |
| Bergapten                  | PubChem CID: 2355           |                                                              |
| Imperatorin                | PubChem CID: 10212          |                                                              |
| Osthole                    | PubChem CID: 10228          |                                                              |
| Isoimperatorin             | PubChem CID: 68081          | Extraction method: HPLC                                      |
| Isopimpinellin             | PubChem CID: 68079          | Reference: [2]                                               |
| Xanthotoxin                | PubChem CID: 4114           |                                                              |
| Columbianetin              | PubChem CID: 92201          | Extraction method: GC-MS                                     |
| Isoporalen                 | PubChem CID: 10658          | Reference: [3]                                               |
| Synonyms: Angelicin        |                             | (with voucher specimen)                                      |
| Fraxetin                   | PubChem CID: 5273569        | Extraction method: UHPLC-ESI-Q-TOF-MS                        |
| 6,7,8-Trimethoxycoumarin   | PubChem CID: 3083928        | Reference: [4]                                               |
| Murrayacarpin A            | ChemSpider ID: 901688       |                                                              |
| Limettin                   | PubChem CID: 2775           |                                                              |
| Scoparone                  | PubChem CID: 8417           |                                                              |
| Isofraxidin                | PubChem CID: 5318565        |                                                              |
| 7-Methoxy-8-formylcoumarin | PubChem SID: 272958589      |                                                              |

|                         |                                                                           |                                                  |
|-------------------------|---------------------------------------------------------------------------|--------------------------------------------------|
| 2'-Deoxymuranin hydrate | PubChem CID: 10659145                                                     |                                                  |
| Oxypeucedanin hydrate   | PubChem CID: 17536                                                        |                                                  |
| Peroxyauraptinol        | No results on PubChem but chemical structure presented in previous review |                                                  |
| Peroxyauraptinol        | No results on PubChem but chemical structure presented in previous review |                                                  |
| Auraptinol              | PubChem CID: 13343541                                                     |                                                  |
| Micromarin-F            | PubChem CID: 10730037                                                     |                                                  |
| Demethyl-auraptinol     | No results on PubChem but chemical structure presented in previous review |                                                  |
| Albiflorin-3            | PubChem SID: 274183832                                                    |                                                  |
| Osthenol                | PubChem CID: 5320318                                                      |                                                  |
| 7-Demethylsuberosin     | PubChem CID: 5316525                                                      |                                                  |
| Cnidilin                | PubChem CID: 821449                                                       |                                                  |
| Angenomalin             | PubChem CID: 51520704                                                     |                                                  |
| Meranzin hydrate        | PubChem CID: 5070783                                                      | Extraction method: HPLC-2D-CCC                   |
| Cnidimoside A           | PubChem CID: 21603474                                                     | Reference: [5]<br>(Voucher number: 20130405-SCZ) |
| Kaempferol              | PubChem CID: 5280863                                                      | Extraction method: HPLC-ESI-MS                   |
| Isorhamnetin            | PubChem CID: 5281654                                                      | Reference: [6]                                   |
| Quercitrin              | PubChem CID: 5280459                                                      | (with voucher specimen)                          |
| Luteolin                | PubChem CID: 5280445                                                      |                                                  |

|                                                                |                                                                           |                                                                          |
|----------------------------------------------------------------|---------------------------------------------------------------------------|--------------------------------------------------------------------------|
| Quercetin                                                      | PubChem CID: 5280343                                                      |                                                                          |
| Hesperidin                                                     | PubChem CID: 10621                                                        |                                                                          |
| Rutin                                                          | PubChem CID: 5280805                                                      |                                                                          |
| Psoralen                                                       | PubChem CID: 6199                                                         | Extraction method: HFCF + HPLC                                           |
| Oxypeucedanin                                                  | PubChem CID: 160544                                                       | Reference: [7]                                                           |
| Cnidimol D                                                     | PubChem CID: 70682746                                                     | Extraction method: HPLC-PDA-ESI-ITMS <sup>n</sup> /TOF-MS                |
| 2'-Hydrate-deoxymeranin                                        | No results on PubChem but chemical structure presented in previous review | Reference: [8]                                                           |
| Phlojodicarpin                                                 | No results                                                                |                                                                          |
| (E/Z) 7-methoxy-8-(3-methylbuta1,3-dien-1-yl)-2H-chromen-2-one | No results                                                                |                                                                          |
| Karenin                                                        | PubChem CID: 6440661                                                      |                                                                          |
| Columbianadin                                                  | PubChem CID: 6436246                                                      |                                                                          |
| Cniforin A                                                     | PubChem SID: 274303750                                                    |                                                                          |
| Daucosterol                                                    | PubChem CID: 5742590                                                      | Extraction method: SGCC<br>Reference: [9]<br>Voucher number: PHD20090318 |
| Xanthotol                                                      | PubChem CID: 65090                                                        | Extraction method: UPLC/ESI-TOF MS/MS<br>Reference: [10]                 |
| O-isovalery columbianetin                                      | No results on PubChem but chemical structure presented in previous review | Extraction method: N/A<br>Reference: [11]                                |
| Iisogosferol                                                   | No results on PubChem but chemical structure presented in pr              | Extraction method: N/A                                                   |

|                                                          |                                                                           |                                                                                                                                    |
|----------------------------------------------------------|---------------------------------------------------------------------------|------------------------------------------------------------------------------------------------------------------------------------|
|                                                          | vious review                                                              | Reference: [12]                                                                                                                    |
| Archangelicin                                            | PubChem CID: 5281371                                                      |                                                                                                                                    |
| (3'R)-3'-hydroxycolumbianetin                            | No results on PubChem but chemical structure presented in previous review |                                                                                                                                    |
| Cniforin B                                               | No results on PubChem but chemical structure presented in previous review |                                                                                                                                    |
| 6-methoxy-8-methylcoumafin                               | No results on PubChem but chemical structure presented in previous review | Extraction method: TLC-MS<br>Reference: [13]                                                                                       |
| Cnidimonal                                               | PubChem CID: 10597338                                                     | Extraction method: HPLC + GC-MS                                                                                                    |
| Cnidimarin                                               | PubChem CID: 101027478                                                    | Reference: [14]<br><br>(Voucher number: TMPW1 9080 in Japan and C-2103 in China)                                                   |
| 1'-O-β-D-glucopyranosyl (2R,3S)-3hydroxynodakenetin      | No results on PubChem but chemical structure presented in previous review | Extraction method: <sup>1</sup> H+ <sup>13</sup> C-NMR,<br><br>IR + UV spectroscopy<br><br>SHPLC + CC + TLC<br><br>Reference: [15] |
| 7-O-methylphellodenol-B                                  | No results on PubChem but chemical structure presented in previous review | Extraction method: <sup>1</sup> H+ <sup>13</sup> C-NMR                                                                             |
| 7-Methoxy-8-(3-methyl-2,3-epoxy-1-oxobutyl)chromen-2-one | PubChem CID: 132277605                                                    | UV spectr<br>scopy<br><br>CC + TLC<br><br>+ SPHPLC                                                                                 |
| 3'-O-methylvaginol                                       | No results on PubChem but chemical structure presented in previous review | Reference: [16]                                                                                                                    |

|                                         |                                                                           |                                                                                |
|-----------------------------------------|---------------------------------------------------------------------------|--------------------------------------------------------------------------------|
| Hassanon                                | No results on PubChem but chemical structure presented in previous review |                                                                                |
| E-murraol                               | No results on PubChem but chemical structure presented in previous review |                                                                                |
| Z-murraol                               | PubChem CID: 15593213                                                     |                                                                                |
| Synonyms: Murraol                       |                                                                           |                                                                                |
| 3'-O-methylmurraol                      | PubChem CID: 137796425                                                    | Extraction method: <sup>1</sup> H+ <sup>13</sup> C-NMR<br>IR + UV spectroscopy |
| Rel-(1'S,2'S)-1'-O-methylphlojodicarpin | No results on PubChem but chemical structure presented in previous review | ESI<br>ESI + HR<br>CC + TL                                                     |
| (1'S,2'S)-1'-O-methylvaginol            | No results on PubChem but chemical structure presented in previous review | C + PTLC<br>Reference: [17]<br>(Voucher number: CM-201010)                     |
| Isobergaptin                            | PubChem CID: 68082                                                        | Extraction method: ESI-MS<br>Reference: [18]<br>(Voucher number: N20140901)    |
| volatile constituents                   |                                                                           |                                                                                |
| $\alpha$ -Pinene                        | PubChem CID: 6654                                                         | Extraction method: GC-MS                                                       |
| Synonyms: L-Pinene                      |                                                                           | Reference: [19]                                                                |
| Camphene                                | PubChem CID: 6616                                                         |                                                                                |
| Limonene                                | PubChem CID: 22311                                                        |                                                                                |

|                                                    |                      |                                             |
|----------------------------------------------------|----------------------|---------------------------------------------|
| Bornyl acetate                                     | PubChem CID: 6448    |                                             |
| 2-Phenyl-2-(phenylmethyl)-1,3-Dioxolane            | No results           |                                             |
| Cyclobutanol                                       | PubChem CID: 76218   |                                             |
| Pyruvic acid                                       | PubChem CID: 1060    |                                             |
| 8-Hexyl-8-pentyl-hexadecane                        | PubChem CID: 521602  |                                             |
| 1,2,4-Benzenetricarboxylic acid-1,2-dimethyl ester | PubChem CID: 610016  |                                             |
| 2-[4-(1,1-Dimethylethyl) phenoxy]-propanoic acid   | No results           |                                             |
| 2-Methyl-docosane                                  | PubChem CID: 519145  |                                             |
| O-Acetylcolumbianetin                              | PubChem CID: 161409  | Extraction method: PCEC<br>Reference: [20]  |
| Isopropyl-3-methylbutanoate                        | PubChem CID: 61914   | Extraction method: GC-MS<br>Reference: [21] |
| Tricyclene                                         | PubChem CID: 79035   |                                             |
| $\beta$ -Pinene                                    | PubChem CID: 14896   |                                             |
| Myrcene                                            | PubChem CID: 31253   |                                             |
| Synonyms: $\beta$ -Myrcene                         |                      |                                             |
| $\alpha$ -Terpinene                                | PubChem CID: 7462    |                                             |
| 1, 3, 7-Octatirene, 3-7-dimethyl                   | PubChem CID: 5320249 |                                             |
| $\beta$ -ocimene                                   | PubChem CID: 5281553 |                                             |
| Synonyms: Trans-ocimene                            |                      |                                             |
| $\gamma$ -terpinene                                | PubChem CID: 7461    |                                             |

|                                                                                                        |                       |
|--------------------------------------------------------------------------------------------------------|-----------------------|
| Cis sabinene hydrate                                                                                   | PubChem CID: 12315152 |
| Terpinolene                                                                                            | PubChem CID: 11463    |
| 1,3,8-p-Menthatriene                                                                                   | PubChem CID: 176983   |
| Synonyms: 1,3,8-para-Menthatriene                                                                      |                       |
| Sabinene hydrate                                                                                       | PubChem CID: 62367    |
| Linalool oxide                                                                                         | PubChem CID: 102611   |
| p-Mentha-1,5,8-triene                                                                                  | PubChem CID: 527424   |
| Trans-p-2,8-menthadien-1-ol                                                                            | PubChem CID: 12618691 |
| Neo-allo-ocimene                                                                                       | PubChem CID: 5371125  |
| Camphor                                                                                                | PubChem CID: 2537     |
| Synonyms: 1, 7, 7-Trimethyl-bicyclo [2.2.1] heptan-2-one                                               |                       |
| P-Mentha-2,8-dien-1-ol                                                                                 | PubChem CID: 155626   |
| Synonyms: 1-Methyl-4-(1-methylethenyl)-2-cyclohexen-1-ol                                               |                       |
| L-Borneol                                                                                              | PubChem CID: 1201518  |
| Synonyms: Borneol (L)                                                                                  |                       |
| 3-Cyclohexen-1-ol, 4-methyl-1-(1-methylethyl)                                                          | PubChem CID: 11230    |
| Synonyms: Terpinene-4-ol; 4-Terpinenol; 4-Carvomenthenol; 4-Methyl-1-(1-methylethyl)-3-cyclohexen-1-ol |                       |
| cis-Dihydrocarvone                                                                                     | PubChem CID: 443167   |
| Bicyclo [5.1.0] octane, 8-(1-methylethylidene)                                                         | PubChem CID: 535068   |
| $\alpha$ -Fenchyl acetate                                                                              | PubChem CID: 107217   |
| Synonyms: Fenchyl acetate;                                                                             |                       |
| Perillyl alcohol                                                                                       | PubChem CID: 10819    |

|                                                                                    |                       |                          |
|------------------------------------------------------------------------------------|-----------------------|--------------------------|
| Synonyms: Perilla alcohol                                                          |                       |                          |
| 2, 6-Octadienoic acid, 3, 7-dimethyl-, methyl ester                                | PubChem CID: 5365910  |                          |
| Synonyms: Methyl geranate; 2,6-Octadienoic acid,3,7-dimethyl-, methyl ester        |                       |                          |
| Carvyl acetate                                                                     | PubChem CID: 7335     |                          |
| Synonyms: 2-Cyclohexen-1-ol, 2-methyl-5-(1-methylethenyl)-, acetate                |                       |                          |
| Neryl acetate                                                                      | PubChem CID: 1549025  |                          |
| $\alpha$ -Copaene                                                                  | PubChem CID: 70678558 |                          |
| $\beta$ -Bourbonene                                                                | PubChem CID: 62566    |                          |
| $\beta$ -Farnesene                                                                 | PubChem CID: 5281517  |                          |
| Synonyms: Trans- $\beta$ -Farnesene; 7,11-Dimethyl-3-methylene-1,6,10-dodecatriene |                       |                          |
| Germacrene D                                                                       | PubChem CID: 5317570  |                          |
| $\beta$ -Bisabolene                                                                | PubChem CID: 10104370 |                          |
| $\delta$ -cadinene                                                                 | PubChem CID: 12306054 |                          |
| Caryophyllene oxide                                                                | PubChem CID: 1742210  |                          |
| Geranyl pentanoate                                                                 | PubChem CID: 6436375  |                          |
| Cis-asarone                                                                        | PubChem CID: 5281758  |                          |
| Synonyms: $\beta$ -Asarone                                                         |                       |                          |
| 2-Pentadecanone,6,10,14-trimethyl                                                  | PubChem CID: 10408    |                          |
| Synonyms: 6, 10, 14-Trimethyl-2-pentadecanone                                      |                       |                          |
| 3-Carene                                                                           | PubChem CID: 26049    | Extraction method: GC-MS |
| Synonyms: 3,7,7-Trimethyl-Bicyclo [4.1.0] hept-3-ene                               |                       | Reference: [22]          |



|                                                                          |                       |
|--------------------------------------------------------------------------|-----------------------|
| D-Limonene                                                               | PubChem CID: 440917   |
| 1-Methyl-4-(1-methylethyl)-cyclohexene                                   | PubChem CID: 21671    |
| 2, 6-Dimethyl-2, 4, 6-octatriene                                         | PubChem CID: 5368821  |
| 2-Isopropenyl-3-methylene-cyclohexanol                                   | PubChem CID: 564552   |
| 2-Methyl-5-isopropenyl-2-enyl ester acetic acid                          | No results            |
| Neryl phenylacetate                                                      | PubChem CID: 91694682 |
| 7, 11-Dimethyl-3-methylene-1, 6, 10-dodecatriene                         | PubChem CID: 10407    |
| Eudesma-4(14),11-diene                                                   | PubChem CID: 442393   |
| Synonyms: $\beta$ -Eudesmene; $\beta$ -Selinene                          |                       |
| 3-Methyl-2-phenylethyl butanoic acid ester                               | PubChem CID: 8792     |
| Synonyms: Phenethyl isovalerate                                          |                       |
| $\alpha$ -Farnesene                                                      | PubChem CID: 5281516  |
| 3, 7-Dimethyl-2,6-octadienyl butanoic acid ester                         | PubChem CID: 7796     |
| 1, 2, 3, 5, 6, 8a-Hexahydro-4, 7-dimethyl-1-(1-methylethyl)-naphthalene  | No results            |
| 1, 4-Diethyl-1, 4-dimethyl-2, 5-cyclohexadiene                           | No results            |
| 1H-Indole-3-butanoic acid                                                | PubChem CID: 8617     |
| 6-Isopropenyl-3-methyl-cyclohex-1-enol                                   | No results            |
| 2-(4a-methyl-8-methylene-decahydro-naphthalene-2-yl)-propan-2-ol         | No results            |
| Tricyclo [4.3.1.0(3, 8)] decan-10-ol                                     | PubChem CID: 584172   |
| 2,2-Dimethyl-propionic acid 5-isopropenyl-2-methyl-cyclohex-2-enyl ester | No results            |

|                                                  |                                                                           |                                               |
|--------------------------------------------------|---------------------------------------------------------------------------|-----------------------------------------------|
| Allyl phenoxyacetate                             | PubChem CID: 24117                                                        |                                               |
| 5,5-Dimethyl-8-methylene-1,2-epoxycyclooct-3-ene | No results                                                                |                                               |
| 6-isopropenyl-3-methyl-cyclohex-2-enol           | No results                                                                |                                               |
| 2-pentacosanone                                  | PubChem CID: 547856                                                       |                                               |
| (Z, Z)-9,12-octadeca-dienoic acid                | No results                                                                |                                               |
| E-9-Tetradecenoic acid                           | PubChem CID: 5312402                                                      |                                               |
| Pentatriacontane                                 | PubChem CID: 12413                                                        |                                               |
| (z)-3-Heptadecen-5-yne                           | PubChem SID: 273541236                                                    |                                               |
| Tetratetracontane                                | PubChem CID: 23494                                                        |                                               |
| $\alpha$ -Cadien                                 | No results                                                                | Extraction method: GC-MS                      |
| Asaron                                           | PubChem CID: 636822                                                       | Reference: [23]                               |
| Carveol                                          | PubChem CID: 7438                                                         |                                               |
| Cnidiadin                                        | PubChem CID: 101937463                                                    | Extraction method: HPLC-MS<br>Reference: [24] |
| Diosmetin                                        | PubChem CID: 5281612                                                      | Extraction method: HPLC-MS-ESI-UV             |
| DL-umtatin                                       | No results                                                                | Reference: [25]                               |
| Cnidimol C                                       | PubChem CID: 70697378                                                     |                                               |
| Cnidimol E                                       | No results                                                                |                                               |
| 5-Formylxanthotoxol                              | PubChem SID: 272958592                                                    |                                               |
| Eduletin                                         | PubChem CID: 5317013                                                      |                                               |
| (3' R)-3'-Hydroxy-columbianedin                  | No results on PubChem but chemical structure presented in previous review | Extraction method: HPLC-ESI-MS                |

|                                                   |                        |                                               |
|---------------------------------------------------|------------------------|-----------------------------------------------|
|                                                   |                        | Reference: [26]                               |
| 3,7-Dimethyl-3(E)-octene-1,2,6,7-tetraol          | No results             | Extraction method: HPLC- <sup>1</sup><br>HNMR |
|                                                   |                        | Reference: [27]                               |
| L-camphene                                        | PubChem CID: 440966    | Extraction method: N/A                        |
| Bornyl isovalerate                                | PubChem CID: 60968     | Reference: [28]                               |
| 2-Butene                                          | PubChem CID: 62695     | Extraction method: GC-MS                      |
| 2-Methylacrolein                                  | PubChem CID: 6562      | Reference: [29]                               |
| Toluol                                            | PubChem CID: 1140      |                                               |
| Isobutyric acid-isopropyl ester                   | PubChem CID: 12044     |                                               |
| 2-Ethylidene-1,1-dimethylcyclopentane             | PubChem CID: 5370115   |                                               |
| 2-Methylbutyric Acid Isopropyl Ester              | PubChem SID: 87560796  |                                               |
| Pentanoate isopropyl ester                        | ChemSpider: ID79025    |                                               |
| Synonyms: Isopropyl valerate                      |                        |                                               |
| 1,7,7-Trimethylbicyclo [2.2.1] heptane            | PubChem CID: 92108     |                                               |
| 4(10)-Thujene                                     | PubChem CID: 18818     |                                               |
| 1,4,8-Menthatriene                                | PubChem CID: 527141    |                                               |
| P-Cymene                                          | PubChem CID: 7463      |                                               |
| 3,5-Dimethylstyrene                               | PubChem CID: 21476     |                                               |
| 1,3,7-Octatriene,3-7-dimethyl                     | PubChem CID: 5320249   |                                               |
| 1,5,8-Menthatriene                                | PubChem CID: 527424    |                                               |
| Synonyms: P-menth-1,5,8-triene                    |                        |                                               |
| 2,2,3-Trimethyl-(R)-3-cyclopentene-1-acetaldehyde | PubChem SID: 134984169 |                                               |

|                                                                                           |                      |                                           |
|-------------------------------------------------------------------------------------------|----------------------|-------------------------------------------|
| Heptane,1-methyl-4-(1-methylethenyl)-7-Oxabicyclo [4,1,0]                                 | PubChem CID: 91496   |                                           |
| Myrtenol                                                                                  | PubChem CID: 10582   |                                           |
| Dihydrocarvone                                                                            | PubChem CID: 24473   |                                           |
| Verbenone                                                                                 | PubChem CID: 29025   |                                           |
| Trans-carveol                                                                             | PubChem CID: 94221   |                                           |
| Carvol                                                                                    | PubChem CID: 16724   |                                           |
| Pinocamphone                                                                              | PubChem CID: 11038   |                                           |
| Isopiperitenone                                                                           | PubChem CID: 79036   |                                           |
| Fructus perillae aldehyde                                                                 | No results           |                                           |
| Z-methyl geranate                                                                         | PubChem CID: 5365912 |                                           |
| Geranyl acetate                                                                           | PubChem CID: 1549026 |                                           |
| Benzyl isovalerate                                                                        | PubChem CID: 7651    |                                           |
| Phenethyl isobutyrate                                                                     | PubChem CID: 7655    |                                           |
| Synonyms: Propionic acid-2-methyl-2-phenylethyl ester                                     |                      |                                           |
| Decahydro-2 $\alpha$ -methyl-6-methylene-1-(1-methylcyclobutyl [1,2,3,4] dicyclopentenyl) | No results           |                                           |
| Trans-caryophyllene                                                                       | PubChem CID: 5281515 |                                           |
| Synonyms: $\beta$ -Caryophyllene; Caryophyllene                                           |                      |                                           |
| Geranyl isobutyrate                                                                       | PubChem CID: 6086514 |                                           |
| $\beta$ -Eudesmol                                                                         | PubChem CID: 91457   | Extraction method: N/A<br>Reference: [30] |
| Cyclofenchene                                                                             | PubChem CID: 79022   | Extraction method: N/A                    |

|                                                                                |                      |                          |
|--------------------------------------------------------------------------------|----------------------|--------------------------|
| $\beta$ -Terpinene                                                             | PubChem CID: 66841   | Reference: [31]          |
| Isoborneol                                                                     | PubChem CID: 64685   |                          |
| Synonyms: Borneol                                                              |                      |                          |
| Azulene                                                                        | PubChem CID: 9231    |                          |
| 1(7),8(10)-p-menthadien-9-ol                                                   | PubChem CID: 34627   |                          |
| Dipentene oxide                                                                | PubChem CID: 232703  |                          |
| $\alpha$ -Cubebene                                                             | PubChem CID: 86609   |                          |
| $\alpha$ -Bergamotene                                                          | PubChem CID: 86608   |                          |
| $\alpha$ -Elemene                                                              | PubChem CID: 80048   |                          |
| Dimethyl ketene                                                                | PubChem CID: 136395  | Extraction method: GC-MS |
| Undecane                                                                       | PubChem CID: 14257   | Reference: [32]          |
| Cis-carveol                                                                    | PubChem CID: 330573  |                          |
| 7H-furo[3,2-g][1] benzopyran-7-one,9- [(4-hydroxy-3-methyl-2-buten 1) oxy]-[E] | No results           |                          |
| Nerolidol                                                                      | PubChem CID: 5284507 |                          |
| Nerolidol isomer                                                               | PubChem CID: 5320128 |                          |
| Cis-isopropenyl-2-methylene-3-cyclohexyl-acetate                               | No results           |                          |
| Propionate                                                                     | PubChem CID: 7336    |                          |
| Tert-butyl phenyl acetate                                                      | PubChem CID: 316203  |                          |
| Diisobutyl phthalate                                                           | PubChem CID: 6782    |                          |
| Linoleic acid                                                                  | PubChem CID: 5280450 |                          |
| Oleic acid                                                                     | PubChem CID: 445639  |                          |

|                                                            |                        |                          |
|------------------------------------------------------------|------------------------|--------------------------|
| Synonyms: 9-Octadecanoic acid                              |                        |                          |
| Stearic acid                                               | PubChem CID: 5281      |                          |
| Synonyms: Octadecanoic acid                                |                        |                          |
| Arachidic acid                                             | PubChem CID: 10467     |                          |
| Synonyms: Eicosanoic acid                                  |                        |                          |
| Ethyl arachidate                                           | PubChem CID: 29009     |                          |
| Propionic-2-methyl-1-methylethyl ester                     | No results             | Extraction method: GC-MS |
| Nonane                                                     | PubChem CID: 8141      | Reference: [33]          |
| $\alpha$ -Methylbenzyl ethanol                             | PubChem SID: 223742051 |                          |
| Trans-sabinene hydrate                                     | PubChem CID: 12315151  |                          |
| Hydroxycitronellal                                         | PubChem CID: 7888      |                          |
| 1-Methyl-4-(1-methylethenyl) cyclohexene                   | PubChem CID: 439250    |                          |
| $\beta$ -Terpineol                                         | PubChem CID: 8748      |                          |
| $\alpha$ -Pineneoxide                                      | PubChem CID: 91508     |                          |
| Vanillin                                                   | PubChem CID: 1183      |                          |
| 4-(1-methylethyl)-benzyl alcohol                           | No results             |                          |
| 3-Cyclohexene-1-methanol, $\alpha$ , $\alpha$ ,4-trimethyl | PubChem CID: 17100     |                          |
| 2-Butyl-1-methyl-pyrrolidine                               | PubChem CID: 558513    |                          |
| Pentanoate-1,3,3-trimethyl-bicyclo [2,2,1] hept-2-yl-ester | No results             |                          |
| 1-Methyl-3-(1-methylethyl)-phenyl                          | No results             |                          |
| 2-Methyl-5-(1-methylethyl)-2-cyclohexen-1-one              | No results             |                          |

|                                                      |                       |                          |
|------------------------------------------------------|-----------------------|--------------------------|
| $\beta$ -Dihydrofuran                                | Patent ID: US9212174  |                          |
| 1,7,7-Trimethyl-bicyclo [2,2,1] heptane-2-ol acetate | No results            |                          |
| 14-Hydroxycaryophyllene                              | PubChem CID: 5352484  |                          |
| Trans-carvacryl acetate                              | No results            |                          |
| $\alpha$ -Muurolene                                  | PubChem CID: 12306047 |                          |
| Cubenol                                              | PubChem CID: 519857   |                          |
| Trans-dihydro thuja alcohol                          | No results            |                          |
| Bicyclogermacrene                                    | PubChem CID: 13894537 |                          |
| Dihydrocalamenene                                    | No results            |                          |
| 6-Methyl- $\alpha$ -ionone                           | PubChem CID: 5371002  |                          |
| Trans sesquihydrate Sabinene                         | No results            |                          |
| Widdrol                                              | PubChem CID: 94334    |                          |
| 4- $\alpha$ -Hydroxy-dihydro-furan-agar              | No results            |                          |
| $\alpha$ -Bisabolol                                  | PubChem CID: 1549992  |                          |
| 2-Camphanyl angelic acid ester                       | No results            |                          |
| Methyl jasmonate                                     | PubChem CID: 5281929  |                          |
| Furfuryl heptadec-one                                | No results            |                          |
| Cis,cis-farnesol                                     | PubChem CID: 1549107  |                          |
| 3-Methyl-2-butene-1-ol                               | PubChem CID: 11173    | Extraction method: GC-MS |
| 2-Pentyl-furan                                       | PubChem CID: 19602    | Reference: [34]          |
| Dehydro-p-cymene                                     | PubChem CID: 62385    |                          |
| Nonanal                                              | PubChem CID: 31289    |                          |

---

|                                                                                      |                       |
|--------------------------------------------------------------------------------------|-----------------------|
| $\beta$ -Linalool                                                                    | PubChem CID: 6549     |
| Synonyms: Linalool; 3,7-Dimethyl-1,6-octadiene-3-ol; 3,7-Dimethyl-1,6-octadiene-3-ol |                       |
| Fenchol                                                                              | PubChem CID: 15406    |
| 2,6-Dimethyl-1,3,5,7-octatetraene                                                    | PubChem CID: 5368451  |
| $\alpha$ -Terpinenol                                                                 | PubChem CID: 443162   |
| Thymol methyl ether                                                                  | PubChem CID: 14104    |
| Undecanal                                                                            | PubChem CID: 8186     |
| Ylangene                                                                             | PubChem CID: 6432119  |
| $\beta$ -Elemene                                                                     | PubChem CID: 6918391  |
| Dodecanal                                                                            | PubChem CID: 8194     |
| Isocaryophyllene                                                                     | PubChem CID: 5281522  |
| $\alpha$ -Cedrene                                                                    | PubChem CID: 11106485 |
| $\alpha$ -Santalene                                                                  | PubChem CID: 94164    |
| Thujopsene                                                                           | PubChem CID: 442402   |
| $\alpha$ -Caryophyllene                                                              | PubChem CID: 5281520  |
| Acoradiene                                                                           | PubChem CID: 90351    |
| $\beta$ -Chamigrene                                                                  | PubChem CID: 442353   |
| $\gamma$ -Muurolene                                                                  | PubChem CID: 12313020 |
| 2-Tridecanone                                                                        | PubChem CID: 11622    |
| $\beta$ -Himachalene                                                                 | PubChem CID: 15095    |
| ar-Curcumene                                                                         | PubChem CID: 92139    |
| $\gamma$ -Elemene                                                                    | PubChem CID: 6432312  |

---



|                                                        |                       |                          |
|--------------------------------------------------------|-----------------------|--------------------------|
| $\alpha$ -Cadinene                                     | PubChem CID: 12306048 |                          |
| $\alpha$ -Longipinene                                  | PubChem CID: 520957   |                          |
| $\alpha$ -Himachalene                                  | PubChem CID: 11830551 |                          |
| Germacrene B                                           | PubChem CID: 5281519  |                          |
| Perillyl acetate                                       | PubChem CID: 61780    |                          |
| Geranyl propionate                                     | PubChem CID: 5355853  |                          |
| Geranyl 3-methyl-butyrate                              | No results            |                          |
| Myristic acid                                          | PubChem CID: 11005    |                          |
| Synonyms: Tetradecanoic acid                           |                       |                          |
| Hexahydro farnesyl acetate                             | No results            |                          |
| 3,7,11,15-Tetramethyl-2-hexadecen-1-ol                 | PubChem CID: 5366244  |                          |
| Palmitoleic acid                                       | PubChem CID: 445638   |                          |
| 2-Methyl-2- $\beta$ -butane-1-ol                       | No results            | Extraction method: GC-MS |
| Isopropyl-isobutyric acid                              | No results            | Reference: [35]          |
| $\alpha$ -Sung terpene                                 | No results            |                          |
| 2(10)-Sung terpene                                     | No results            |                          |
| Pentylbenzene                                          | PubChem CID: 10864    |                          |
| Bicyclo [2.2.1] heptan-2-ol,1,3,3-trimethyl-,2-acetate | PubChem CID: 61696    |                          |
| 5-Propene-2-cyclopenten-1-ol                           | No results            |                          |
| 2-Methyl-5-propene-2-cyclopentene-1-acetate            | No results            |                          |
| 1-Phenyl-1-pentanone                                   | PubChem CID: 66093    |                          |
| 1-Propyl-3,4-dimethoxybenzene                          | No results            |                          |

|                                                             |                       |                          |
|-------------------------------------------------------------|-----------------------|--------------------------|
| $\alpha$ -Selinene                                          | PubChem CID: 10856614 |                          |
| Cinnamyl acetate                                            | PubChem CID: 5282110  |                          |
| Cedrol                                                      | PubChem CID: 65575    |                          |
| 8-(3-methyl-2- $\beta$ ) hem                                | No results            |                          |
| P-mentha-E-2,8(9)-dien-1-ol                                 | No results            | Extraction method: GC-MS |
| 3-Cyclohexaen-1-ol                                          | PubChem CID: 556685   | Reference: [21]          |
| Synonyms: 3-Cyclohexen-1-ol                                 |                       |                          |
| 4-Methyl-1-(1-methylethyl)-3-cyclohexaen-1-ol               | No results            |                          |
| Octadecanal                                                 | PubChem CID: 12533    |                          |
| 1-Octadecene                                                | PubChem CID: 8217     |                          |
| Stigmast-5-en-3-ol (3 $\beta$ , 24s)                        | PubChem CID: 457801   |                          |
| Synonyms: Clionasterol; $\gamma$ -Sitosterol                |                       |                          |
| 6,6-Dimethyl-2-bicyclo [3,1,1] heptane                      | No results            | Extraction method: GC-MS |
| 4-Methyl-1-(1-methylethyl)-2-cyclohexene-1-ol               | No results            | Reference: [22]          |
| 5-Isopropenyl-2-methyl-cyclohex-2-enyl propionic acid ester | No results            |                          |
| 1,4-Dimethyl-3-cyclohexene-1-ethanol                        | No results            |                          |
| Tricyclo [4.4.0.0 (2,8)] decan-4-ol                         | PubChem CID: 564289   |                          |
| 5-Isopropenyl-3-methyl-cyclohex-1-enol                      | No results            |                          |
| Liposoluble compounds                                       |                       |                          |
| 2,4-Dimethylhexane                                          | PubChem CID: 11511    | Extraction method: GC-MS |
| 2,3-Dimethylhexane                                          | PubChem CID: 11447    | Reference: [36]          |

---

|                                         |                      |                         |
|-----------------------------------------|----------------------|-------------------------|
| 2,3,4-Trimethylhexane                   | PubChem CID: 13533   | (with voucher specimen) |
| 2-Methylheptane                         | PubChem CID: 11594   |                         |
| 3-Methylheptane                         | PubChem CID: 11519   |                         |
| Octane                                  | PubChem CID: 356     |                         |
| 5-Ethyl-2,4-dimethyl-2-heptene          | PubChem CID: 557846  |                         |
| 1,2,5,5-Tetramethyl-1,3-cyclopentadiene | PubChem CID: 572142  |                         |
| Heptadecane                             | PubChem CID: 12398   |                         |
| Z-11-tetradecenoic acid                 | PubChem CID: 5362743 |                         |
| Octadecane                              | PubChem CID: 11635   |                         |
| Pentadecanoic acid                      | PubChem CID: 13849   |                         |
| Nonadecane                              | PubChem CID: 12401   |                         |
| (z)-7-Hexadecenoic acid                 | PubChem CID: 5318393 |                         |
| Eicosane                                | PubChem CID: 8222    |                         |
| Heptadecanoic acid                      | PubChem CID: 10465   |                         |
| 6,9,12-Octadecatrienoic acid            | PubChem CID: 3453    |                         |
| 9,12-Octadecadienoic acid               | PubChem CID: 3931    |                         |
| 9,12,15-Octadecatrienoic acid           | PubChem CID: 860     |                         |
| Phytol                                  | PubChem CID: 5280435 |                         |
| 7,10,13-Eicosatrienoic acid             | PubChem CID: 5312532 |                         |
| Heneicosane                             | PubChem CID: 12403   |                         |
| Docosanoic acid                         | PubChem CID: 8215    |                         |
| Tricosanoic acid                        | PubChem CID: 17085   |                         |

---

|                                                |                        |                            |
|------------------------------------------------|------------------------|----------------------------|
| Tetracosanoic acid                             | PubChem CID: 11197     |                            |
| Nonacosane                                     | PubChem CID: 12409     |                            |
| Stigmast-4-en-3-one                            | PubChem CID: 5484202   |                            |
| Hexacosanoic acid                              | PubChem CID: 10469     |                            |
| Tocopherols                                    | PubChem CID: 14986     |                            |
| Octacosanoic acid                              | PubChem CID: 10470     |                            |
| <b>Chromones</b>                               |                        |                            |
| Cnidimol B                                     | ChemSpider ID:10235600 | Extraction method: ESI-MS  |
| Peucenin                                       | PubChem CID: 68477     | Reference: [37]            |
| 5,7-Dihydroxychromone                          | PubChem CID: 5281343   | (with voucher specimen)    |
| 5-O-Methylvisamminol                           | PubChem CID: 441970    |                            |
| 4'-O- $\beta$ -D-glucosyl-5-O-methylvisamminol | PubChem CID: 21670038  |                            |
| Hamaudol                                       | PubChem CID: 164722    |                            |
| 2,5-Dimethyl-7-hydroxychromone                 | PubChem CID: 5316891   |                            |
| Cimifugin                                      | PubChem CID: 441960    |                            |
| 5-Hydroxy-chromone-7-O- $\beta$ -D-glucoside   | No results             |                            |
| Eduotin IV                                     | No results             | Extraction method: HPLC-MS |
|                                                |                        | Reference: [24]            |
| Oroselone                                      | PubChem CID: 74477     | Extraction method: PCEC    |
|                                                |                        | Reference: [20]            |
| Cnidimol A                                     | PubChem CID: 129317384 | Extraction method: N/A     |
|                                                |                        | Reference: [12]            |

|                                                                                                           |                        |                                                                                                                   |
|-----------------------------------------------------------------------------------------------------------|------------------------|-------------------------------------------------------------------------------------------------------------------|
| Cindimol F                                                                                                | No results             | Extraction method: $^1\text{H}+^{13}\text{C}$ -NMR<br>Reference: [38]                                             |
| Cindimoside A                                                                                             | No results             | Extraction method: HPLC-GC-MS<br>Reference: [14]<br>(Voucher number: C-2103)                                      |
| Hydroxycnidimoside A                                                                                      | PubChem CID: 70689051  | Extraction method: $^1\text{H}+^{13}\text{C}$ -NMR<br>IR + UV spectroscopy<br>SHPLC + CC + TLC<br>Reference: [15] |
| Undulatoside A                                                                                            | PubChem CID: 5321494   | Extraction method: $^1\text{H}+^{13}\text{C}$ -NMR                                                                |
| Saikochromoside A                                                                                         | PubChem CID: 70697379  | Reference: [39]                                                                                                   |
| Cnidimoside B                                                                                             | PubChem CID: 70682745  |                                                                                                                   |
| 2-Methyl-5-hydroxy-6-(2-butenyl-3-hydroxy methyl)-7-( $\beta$ -D-glucopyranosyloxy)-4H-1-benzopyran-4-one | No results             |                                                                                                                   |
| Monnieriside A                                                                                            | PubChem CID: 70686986  |                                                                                                                   |
| Monnieriside B                                                                                            | PubChem CID: 70695364  |                                                                                                                   |
| Monnieriside C                                                                                            | PubChem CID: 70686988  |                                                                                                                   |
| Monnieriside D                                                                                            | PubChem CID: 70682747  |                                                                                                                   |
| Monnieriside E                                                                                            | PubChem CID: 70689052  |                                                                                                                   |
| Monnieriside F                                                                                            | PubChem CID: 70682748  |                                                                                                                   |
| Monnieriside G                                                                                            | PubChem CID: 124510520 |                                                                                                                   |
| 6'-Hydroxylangelicain                                                                                     | PubChem CID: 70695365  |                                                                                                                   |

---

Monoterpenoid glucosides

---

3,7-Dimethyloct-1-ene-3,6,7-triol 3-O- $\beta$ -D-glucopyranoside      PubChem CID: 10641593      Extraction method:  $^{13}\text{C}$ -NMR

---

Enzymatic hydrolysis      No results      Reference: [40]

---

(2s)-3,7-Dimethyloct-3(10),6-diene-1,2-diol 2-O- $\beta$ -D-glucopyranoside      No results

---

(4S)-P-menth-1-ene-7,8-diol 8-O- $\beta$ -D-glucopyranoside      No results

---

(3'R)-Hydroxymarmesin 4'-O- $\beta$ -D-glucopyranoside      PubChem CID: 10836072

Synonyms: Smyrindiolide

---

Xanthotoxol 8-O- $\beta$ -D-glucopyranoside      No results

---

2-Methyl-5,7-dihydroxychromone 7-O- $\beta$ -D-glucopyranoside      No results

---

3,7-Dimethyloctane-1,2,6,7-tetrol      PubChem CID: 10655888      Extraction method:  $^{13}\text{C}$ -NMR

---

(6,7-threo)-3,7-Dimethyloct-3(10)-ene-1,2,6,7,8-pentol      No results      Reference: [41]

---

(6,7-erythro)-3,7-Dimethyloct-3(10)-ene-1,2,6,7,8-pentol      No results

---

3,7-Dimethyl-1,2,6,7-tetrahydroxy-oct-3(10)-ene      No results      Extraction method:  $^1\text{H}+^{13}\text{C}$ -NMR

---

1-Triacetate      PubChem CID: 219721      Reference: [42]

---

3-Methyl-1,2,3,4-tetrahydroxy-butane      No results

---

2-Triacetate      No results

---

3,7-Dimethyl-3 $\beta$ ,8-dihydroxy-oct-1,6-diene 3-O- $\beta$ -D-glucopyranoside      No results

---

Glycerol      PubChem CID: 753

---

Terpenoids, Glycosides, Glucides

---

|                                                                            |                         |                                                                       |
|----------------------------------------------------------------------------|-------------------------|-----------------------------------------------------------------------|
| (2S,3R)-2-Methylbutane-1,2,3,4-tetrol<br>Synonyms: 2-C-methyl-D-erythritol | PubChem CID: 11400799   | Extraction method: $^1\text{H}+^{13}\text{C}$ -NMR<br>Reference: [42] |
| Lactone                                                                    | PubChem CID: 5585       | Extraction method: IR + UV spectroscopy                               |
| Alloimperatorin                                                            | PubChem CID: 69502      | Reference: [43]                                                       |
| Cnidimin                                                                   | PubChem CID: 91698393   |                                                                       |
| Cnidioside A                                                               | Chemspider ID: 10213905 | Extraction method: N/A                                                |
| Cnidioside B                                                               | No results              | Reference: [44]                                                       |
| Cnidioside C                                                               | No results              |                                                                       |
| Cnidiol B                                                                  | No results              |                                                                       |
| Cnidiol C                                                                  | PubChem CID: 26396      |                                                                       |
| 3,7-Dimethyloct-1-ene-3,6,7-triol                                          | ChemSpider ID: 10260607 | Extraction method: $^{13}\text{C}$ -NMR                               |
| Trans-p-menthane-1 $\beta$ ,2 $\alpha$ ,8,9-tetrol                         | No results              | Reference: [41]                                                       |
| Torilin                                                                    | PubChem CID: 6450226    | Extraction method: MS- $^1\text{D}$ NMR- $^2\text{D}$ NMR             |
| Torilolone                                                                 | PubChem CID: 10444938   | Reference: [45]                                                       |
| 1-Hydroxyhorilin                                                           | No results              | (Voucher number: WP194)                                               |
| Picraquassioside A                                                         | PubChem CID: 85502992   | Extraction method: SGCC-S PHPLC                                       |
| Methylpicraquassioside A                                                   | PubChem CID: 85363137   | Reference: [46]                                                       |
| Picraquassioside B                                                         | No results              |                                                                       |
| Methylpicraquassioside B                                                   | No results              |                                                                       |
| Xanthotoxol-8- $\beta$ -glucoside                                          | No results              |                                                                       |
| 5-Methoxy-xanthotoxol-8- $\beta$ -glucoside                                | No results              |                                                                       |
| 8-Methoxy-xanthotoxol-5- $\beta$ -glucoside                                | No results              |                                                                       |

|                                                                           |                         |                                        |
|---------------------------------------------------------------------------|-------------------------|----------------------------------------|
| Marmesinin                                                                | PubChem CID: 216283     |                                        |
| L-rhamnose                                                                | PubChem CID: 25310      |                                        |
| D-xylose                                                                  | PubChem CID: 135191     | Extraction method: N/A                 |
| L-arabinose                                                               | PubChem CID: 439195     | Reference: [47]                        |
| D-galactose                                                               | PubChem CID: 6036       |                                        |
| D-mannose                                                                 | PubChem CID: 18950      |                                        |
| D-apiose                                                                  | ChemSpider ID: 16735670 |                                        |
| Erythritol                                                                | PubChem CID: 222285     | Extraction method: <sup>13</sup> C-NMR |
| D-threitol                                                                | PubChem CID: 169019     | Reference: [40]                        |
| D-mannitol                                                                | PubChem CID: 6251       |                                        |
| 2-Deoxy-d-ribo-1,4-lactone                                                | PubChem CID: 161815     | Extraction method: HPLC                |
| Glycerol-2-O- $\alpha$ -L-fucose galactoside                              | No results              | Reference: [48]                        |
| 6-Deoxy-D-glucitol                                                        | PubChem CID: 151266     | (Voucher number: MU9617<br>15Y)        |
| Synonyms: D-quinovitol                                                    |                         |                                        |
| 1-Deoxy-D-glucitol                                                        | PubChem CID: 3429       |                                        |
| D-hamamelose                                                              | PubChem CID: 193393     |                                        |
| Other compounds                                                           |                         |                                        |
| Palmitic acid                                                             | PubChem CID: 985        | Extraction method: N/A                 |
| Synonyms: N-hexadecanoic acid; Hexadecanoic acid                          |                         | Reference: [49]                        |
| Sitosterol                                                                | PubChem CID: 222284     |                                        |
| Synonyms: Beta-sitosterol 22,23-dihydro-stigmasterol; $\beta$ -Sitosterol |                         |                                        |
| P-coumaric acid                                                           | PubChem CID: 637542     | Extraction method: N/A                 |



|                                                                                                                                                                                                              |                        | Reference: [12]        |
|--------------------------------------------------------------------------------------------------------------------------------------------------------------------------------------------------------------|------------------------|------------------------|
| Thymine                                                                                                                                                                                                      | PubChem CID: 1135      | Extraction method: N/A |
| Synonyms: 5-Methyl uracil                                                                                                                                                                                    |                        | Reference: [50]        |
| Hypoxanthine                                                                                                                                                                                                 | PubChem CID: 135398638 |                        |
| Uracil                                                                                                                                                                                                       | PubChem CID: 1174      |                        |
| L- (+) valine                                                                                                                                                                                                | PubChem CID: 6287      |                        |
| D-Phenylalanine                                                                                                                                                                                              | PubChem CID: 71567     |                        |
| Cnideoside A                                                                                                                                                                                                 | No results             | Extraction method: N/A |
| Cnideoside B                                                                                                                                                                                                 | No results             | Reference: [51]        |
| CEC: Capillary Electro-Chromatography                                                                                                                                                                        |                        |                        |
| HPLC: High Performance Liquid Chromatography                                                                                                                                                                 |                        |                        |
| GC-MS: Gas chromatography–mass spectrometry                                                                                                                                                                  |                        |                        |
| UHPLC-ESI-Q-TOF-MS: Ultra-high-performance liquid chromatography coupled with electrospray ionization quadrupole time-of flight tandem mass spectrometry                                                     |                        |                        |
| 2D-CCC-HPLC: two-dimensional counter current chromatography-high performance liquid chromatography                                                                                                           |                        |                        |
| HPLC–ESI-MS: high performance liquid chromatography–electrospray ionization-mass spectrometry                                                                                                                |                        |                        |
| HFCF + HPLC: Hollow fiber cell fishing with high performance liquid chromatography                                                                                                                           |                        |                        |
| HPLC-PDA-ESI-ITMS <sup>n</sup> /TOF-MS: high-performance liquid chromatography coupled with photodiode array, electrospray ionisation ion trap tandem mass spectrometry and time of flight mass spectrometry |                        |                        |
| UPLC/ESI-TOFMS/MS: ultra-performance liquid chromatographic coupled to electrospray ionization time of flight mass                                                                                           |                        |                        |
| TLC-MS: Thin layer chromatography/mass spectrometry                                                                                                                                                          |                        |                        |
| <sup>1</sup> H+ <sup>13</sup> C-NMR,                                                                                                                                                                         |                        |                        |
| <sup>1</sup> H+ <sup>13</sup> C-Nuclear magnetic resonance,                                                                                                                                                  |                        |                        |
| IR + UV spectroscopy: Infrared spectra + Ultraviolet spectra                                                                                                                                                 |                        |                        |
| HPLC + CC + TLC: high performance liquid chromatography + column chromatography + Thin layer chromatography                                                                                                  |                        |                        |
| ESI + HRESI: Electrospray ionisation and high-resolution electrospray ionization-mass spectra                                                                                                                |                        |                        |

---

CC + TLC + PTLC: column chromatography + Thin layer chromatography + preparative thin-layer chromatography

PCEC: pressurized capillary electrochromatography

SGCC-SPHPLC: silica gel column chromatography + semi-preparative high-performance liquid chromatography

---

## References

1. Chen, Z., et al., *A fast and accurate method for the pharmacokinetic research of four coumarin analogs in Fructus cnidii using capillary electro-chromatography with a methacrylate ester-based monolithic column*. *Electrophoresis*, 2017. **38**(22-23): p. 3036-3047.
2. Song, L., Jiao., et al., *Simultaneous determination of coumarins and fingerprint analysis in Cnidium monnieri(L.) Cuss.* *Tianjin Journal of Traditional Chinese Medicine*, 2016(06).
3. Song, G.S., et al., *Simultaneous quantification of 7 coumarins in common cnidium fruit by GC-MS*. *Yaoxue Xuebao*, 2016. **51**(4): p. 626-630.
4. Jia, M., et al., *Qualitative Analysis and Quality Evaluation of Cnidium monnieri Using UHPLC-ESI-Q-TOF/MS*. *Chinese Herbal Medicines*, 2016. **8**(4): p. 323-330.
5. Wang, D., et al., *On-line two-dimensional countercurrent chromatography×high performance liquid chromatography system with a novel fragmentary dilution and turbulent mixing interface for preparation of coumarins from Cnidium monnieri*. *Journal of Chromatography A*, 2015. **1406**: p. 215-223.
6. Song, G., et al., *Simultaneous quantification of 16 bioactive constituents in Common cnidium fruit by liquid chromatography-electrospray ionization-mass spectrometry*. *Journal of Pharmaceutical and Biomedical Analysis*, 2015. **107**: p. 304-310.
7. Xue, X., et al., *Hollow fiber cell fishing with high performance liquid chromatography for screening bioactive compounds from traditional Chinese medicines*. *J Chromatogr A*, 2013. **1280**: p. 75-83.
8. Gao, F., et al., *Optimal extraction and fingerprint analysis of Cnidii fructus by accelerated solvent extraction and high performance liquid chromatographic analysis with photodiode array and mass spectrometry detections*. *Food Chem*, 2013. **141**(3): p. 1962-71.
9. Dien, P.H., et al., *Main constituents from the seeds of Vietnamese Cnidium monnieri and cytotoxic activity*. *Nat Prod Res*, 2012. **26**(22): p. 2107-11.

10. Li, K., Ping., C. Gao, and W. Li, Min., *Analysis of coumarins in extract of Cnidium monnieri by ultra-performance liquid chromatographic coupled to electrospray ionization time of flight mass/mass spectrometry*. Chinese Traditional Patent Medicine, 2009(04).
11. Liu, S.S., F. Li, and W. Zheng, *Medicine Research Abstracts*, in Science Press. 1979, Science Press: Bei Jing. p. 1962–1974.
12. Baba, K., et al., *Chemical studies on Chinese crude drug 'She Chuang Zi'*. Shoyakugaku Zasshi, 1985. **39**: p. 282–290.
13. Liu, J.Q., et al., *TLC-MS identification of coumarins from extracts of Cnidium monnieri (L.) Cusson*. J. Instrumental Anal, 1999. **18**: p. 26–28.
14. Cai, J.N., et al., *Coumarins from the fruits of Cnidium monnieri*. J. Nat. Prod, 2000. **63**: p. 485–488.
15. zhao, J., Yu., et al., *Chromones and coumarins from the dried fructus of Cnidium monnieri*. Fitoterapia, 2011. **82**: p. 767–771.
16. Chang, C.-I., et al., *8-Alkylcoumarins from the fruits of Cnidium monnieri protect against hydrogen peroxide induced oxidative stress damage*. Int. J. Mol. Sci., 2014. **15**: p. 4608–4618.
17. Lee, T.-H., et al., *New Coumarins and Anti-Inflammatory Constituents from the Fruits of Cnidium monnieri*. Int. J. Mol. Sci., 2014(15): p. 9566–9578.
18. Duan, X., Hong., et al., *Chemical constituents isolated from fruits of Cnidium monnieri and their effects on proliferation of UMR106 cells*. Chinese Traditional and Herbal Drugs, 2016(17).
19. Chen, Q., et al., *Identification and quantification of the volatile constituents in Cnidium monnieri using supercritical fluid extraction followed by GC-MS*. Journal of Separation Science, 2009. **32**(2): p. 252-257.
20. Chen, D., et al., *Separation and determination of coumarins in Fructus cnidii extracts by pressurized capillary electrochromatography using a packed column with a monolithic outlet frit*. J Pharm Biomed Anal, 2009. **50**(5): p. 695-702.
21. Zhu, Y., Y. Gu, Hua., and L. Zhu, *Analysis of the Essential Oil from Cnidium monnieri in Two Different Producing Areas by GC-MS*. China Pharmacy, 2008(33).
22. Zhao, F., Chun., et al., *The Volatile Constitutes of Cnidium Monnieri by GC/MS*. Journal of Chinese Mass Spectrometry Society, 2008(06).
23. Zhao, L.H., et al., *Studies on fingerprints of Fructus cnidii by GC and GC-MS*. Chinese Pharmaceutical Journal, 2007. **42**(12): p. 889-891.
24. Yang, X., S.-P. Yang, and X. Zhang, *[Chromatographic fingerprint of Cnidium monnieri]*. Yao xue xue bao = Acta pharmaceutica Sinica, 2007. **42**(8): p. 877-881.

25. Chen, Y., et al., *Fingerprint analysis of the fruits of Cnidium monnieri extract by high-performance liquid chromatography-diode array detection-electrospray ionization tandem mass spectrometry*. Journal of Pharmaceutical and Biomedical Analysis, 2007. **43**(3): p. 926-936.
26. Jiang, Y.Q., *Analysis of coumarins in Fructus Cnidii by HPLC-ESI-MS*. Zhong yao cai = Zhongyao cai = Journal of Chinese medicinal materials, 2006. **29**(10): p. 1033-1035.
27. Osorio, C., et al., *Stereochemistry of (3E)-3,7-dimethyl-3-octene-1,2,6,7-tetraol isolated from Passiflora quadrangularis*. Tetrahedron Asymmetry, 1999. **10**(22): p. 4313-4319.
28. Nakao, M., *About Cnidium ingredients*. Pharmaceut. J., 1920: p. 685.
29. Meng, Z.M., C.G. Jin, and S.X. Zhao, *The GC-MS analysis of volatile oil of fructus Cnidii*. J. Nanjing Coll. Pharm, 1986. **17**: p. 167.
30. Xiang, R.D., et al., *Primary studies on chemical constituents of the volatile oil of Cnidium monnieri (L.) Cusson*. J. Chin. Pharm. Univ, 1989. **20**: p. 92-93.
31. Qin, L.P., H. Wu, and T.J. Wang, *Component analysis of volatile oil in fruit of Cnidium monnieri and Cnidium dahuricum*. Chin. Tradit. Herb. Drugs, 1992. **23**: p. 330.
32. Wang, H.B., et al., *Applied study of supercritical-CO<sub>2</sub> fluid extraction in extracting volatile constituents of Cnidium monnieri seeds*. China journal of Chinese materia medica, 1996. **2**: p. 018.
33. Qiu, Q., et al., *Determination of chemical constituents of the essential oil from Cnidium monnieri by GC-MS*. J. Chin. Med. Mater, 2002. **25**: p. 561.
34. Zhou, Y., hong, Y. Li, lin., and L. Wang, sheng. , *Analysis of chemical components of the essential oil from Fructus Cnidii*. Guangxi Univ. Nat. Sci. Edit, 2005. **30**: p. 263.
35. Zhu, Y., *Determination of chemical constituents of the essential oil from Cnidium by GC-MS*. Li Shi Zhen Med. Mater. Med. Res, 2006. **10**: p. 055.
36. Ji, Z., Qiang., et al., *Analysis of Liposoluble Constituents in Fruit of Cnidium Monnieri by GC-MS*. China Pharmacist, 2015(11).
37. Duan, X., Hong., et al., *Chomones from fruit of Cnidium monnieri and their effects on proliferation of UMR106 cells*. Chinese Traditional and Herbal Drugs, 2015(22).
38. Kimiye, B., et al., *Chormones from Cnidium monnieri*. Phytochemistry 1992. **31**: p. 1367-1370.
39. Kim, S., Beom., et al., *Anti-adipogenic chromone glycosides from Cnidium monnieri fruits in 3T3-L1 cells*. Bioorg. Med. Chem. Lett, 2012. **22**: p. 6267-6271.
40. Kitajima, J., et al., *Monoterpenoid glucosides of Cnidium monnieri fruit*. Chemical and Pharmaceutical Bulletin, 1999. **47**(5): p. 639-642.

41. Kitajima, J., et al., *Monoterpenoid polyols in fruit of Cnidium monnieri*. Chemical and Pharmaceutical Bulletin, 1998. **46**(10): p. 1580-1582.
42. Kitajima, J. and Y. Tanaka, *New monoterpenoid and hemiterpenoid tetraol of the crude drug 'She chuang zi'*. Chemical and Pharmaceutical Bulletin, 1993. **41**(9): p. 1667-1669.
43. Nikonov, G.K., *Investigation of lactones of monniers cnidium-cnidium monnieri (L) cuss.* Journal of General Chemistry Ussr, 1964. **34**(4): p. 1350-&.
44. Yahara, S., et al., *Studies on the constituents of Cnidii monnieri Fructus*. J. Pharmacogn, 1993. **47**: p. 74-78.
45. Oh, H., et al., *Sesquiterpenes with hepatoprotective activity from Cnidium monnieri on tacrine-induced cytotoxicity in Hep G2 cells*. Planta Medica, 2002. **68**: p. 748-749.
46. Kim, S., Beom., et al., *A new phenolic glycoside from Cnidium monnieri fruits*. Nat. Prod. Res., 2013. **27**: p. 1945-1948.
47. Hai, H. and H.P. Zeng, *Research on polysaccharides of Cnidium monnieri*. . Guangzhou Chem. Ind., 1995. **23**: p. 29-30.
48. Kitajima, J., T. Ishikawa, and Y. Aoki, *Glucides of Cnidium monnieri fruit*. Phytochemistry, 2001. **58**: p. 641-644.
49. Xiang, R.D. and X.H. Fu, *Study of the chemical constituents of Cnidium(I)*. . Chin. Tradit. Herb. Drugs 1984. **9**: p. 14.
50. Xiang, R.D., *Research on active constituents of water extracts of Cnidium monnieri*. . Chin. Tradit. Herb. , 1999. **11**: p. 813.
51. Chen, Y., G. Zhang, Gang., and Z. Yu, Ping., *The advancement in the chemical and pharmacological study of the fruits of Cnidium monnieri*. Journal of Shenyang Pharmaceutical University, 2006. **23**(4).
